# Supplementary material
Source: Research Square preprint supplement (doi:10.21203/rs.3.rs-9063095/v1)
Supplement: Supplementary file 1 [file 0955516657c6e4cdd8c9fa44.docx]

**Supplementary material**

**Systemic neuroimmune reconfiguration and synaptic restoration in Alzheimer’s disease by young xenogeneic extracellular vesicles**

**Xiaoyang Lu1, Yiling Jiang1, Xiuqing Lin1, Yuanxing Zhang1,** **Qin Liu1,*, and Shouwen Chen1,***

1State Key Laboratory of Bioreactor Engineering, Shanghai Frontiers Science Center of Optogenetic Techniques for Cell Metabolism, East China University of Science and Technology, Shanghai, 200237

* Correspondence:

Qin Liu:qinliu@ecust.edu.cn; Shouwen Chen: swchen@ecust.edu.cn


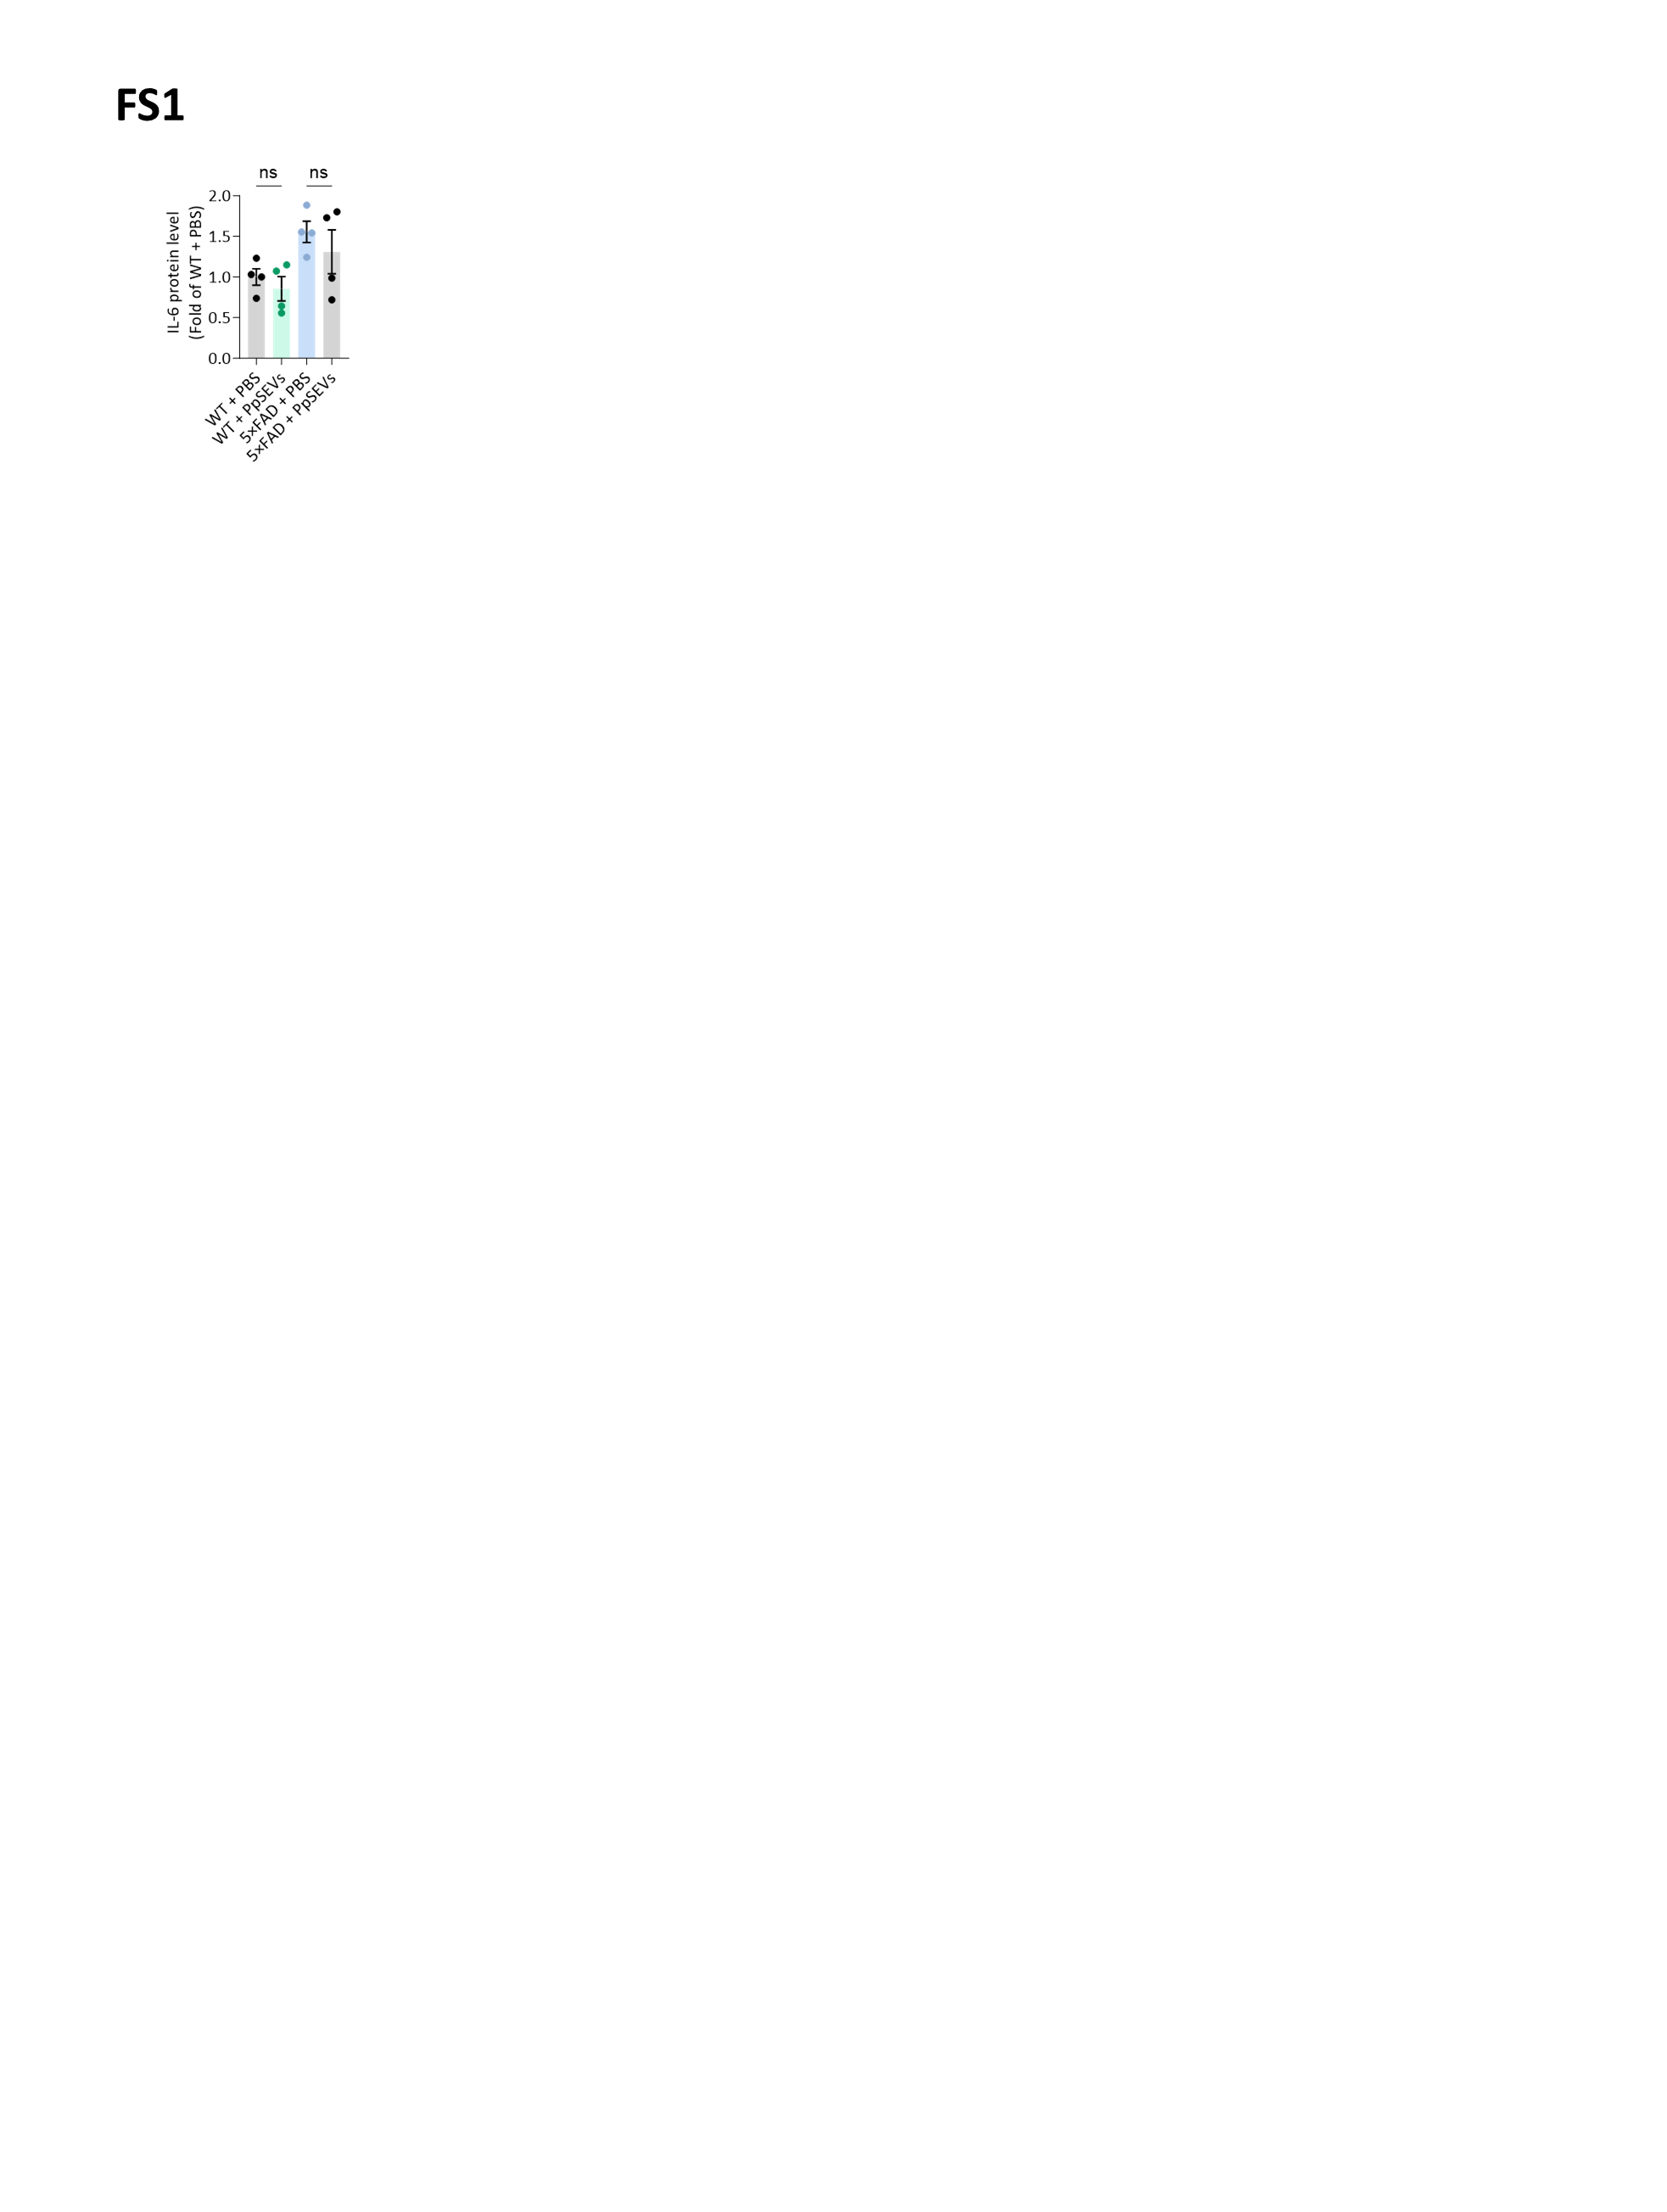


**Supplementary Figure 1.** **ELISA analysis of IL-6 protein in mouse plasma.**


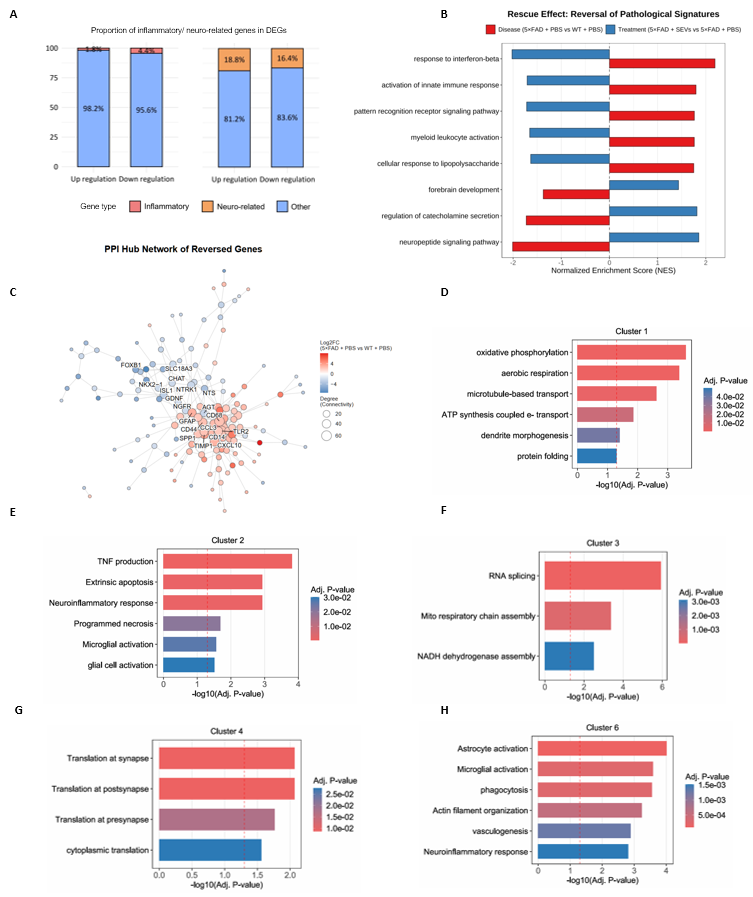


**Supplementary Figure 2. PpSEVs normalize transcriptomic profiles toward wild-type levels in 5×FAD mice**. **(A)** Functional categorization of upregulated and downregulated genes in PpSEV-treated 5×FAD mice. **(B)** Gene Set Enrichment Analysis (GSEA) reveals rescue of key biological pathways. **(C)** Protein-Protein Interaction (PPI) network of rescued genes. **(D-H)** GO Biological Process enrichment analysis of gene clusters 1-6 from Fig. 4F. Cluster 5 showed no significant enrichment.


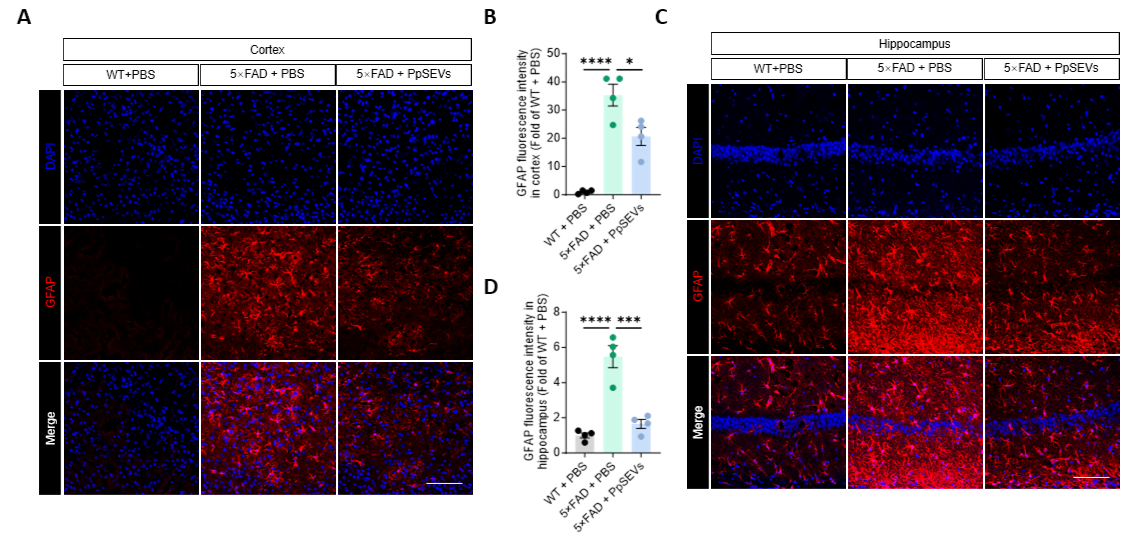


**Supplementary Figure 3. PpSEVs attenuate astrocyte reactivity**. **(A and B**) Representative IF images of cortex sections collected from treated mice co-stained with anti-GFAP antibody **(A)**, and quantification of GFAP fluorescence intensity measured by ImageJ **(B)**. Scale bars, 100 μm (*n* = 4 replicates per group). **(C and D)** Representative IF images of hippocampus sections co-stained with anti-GFAP antibody **(C)**, and quantification of GFAP fluorescence intensity **(D)** (*n* = 4 replicates per group).


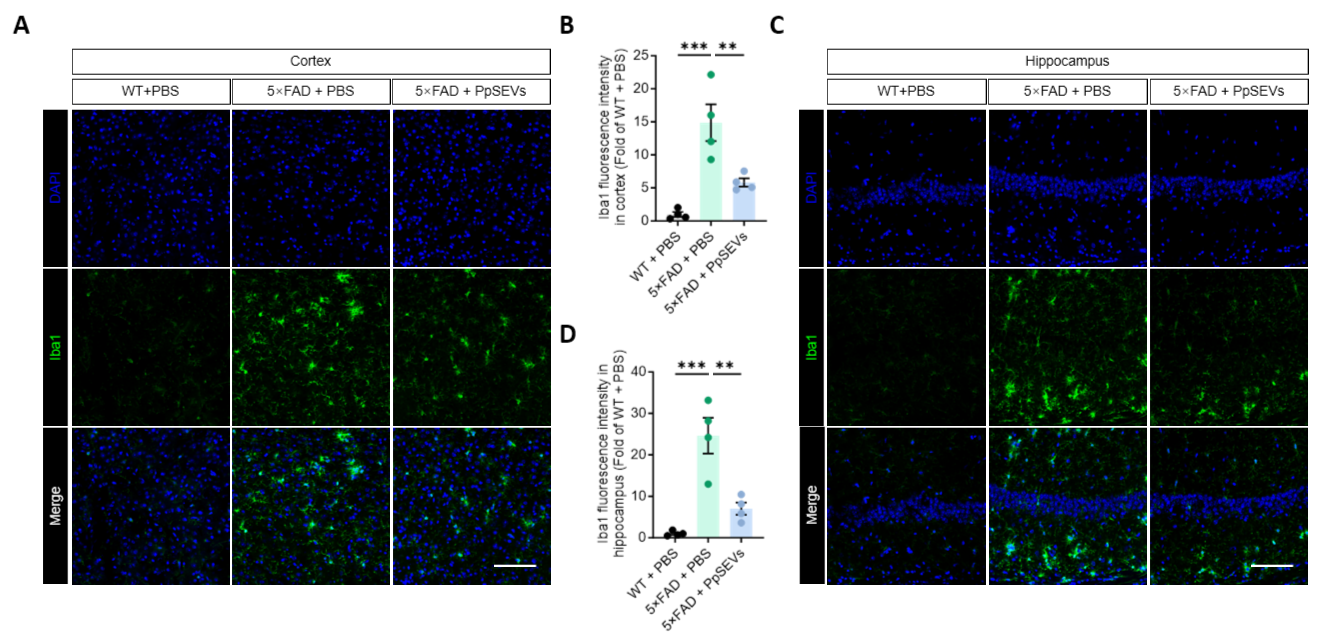


**Supplementary Figure 4. PpSEVs attenuate microglial activation**. **(A and B)** Representative IF images of cortex sections stained with anti-Iba1 antibody (**A**), and quantification of Iba1 fluorescence intensity measured by ImageJ (**B**). Scale bars, 100 μm (*n* = 4 replicates per group). **(C and D)** Representative IF images of hippocampus sections stained with anti-Iba1 antibody **(C)**, and quantification of Iba1 fluorescence intensity **(D)** (*n* = 4 replicates per group).


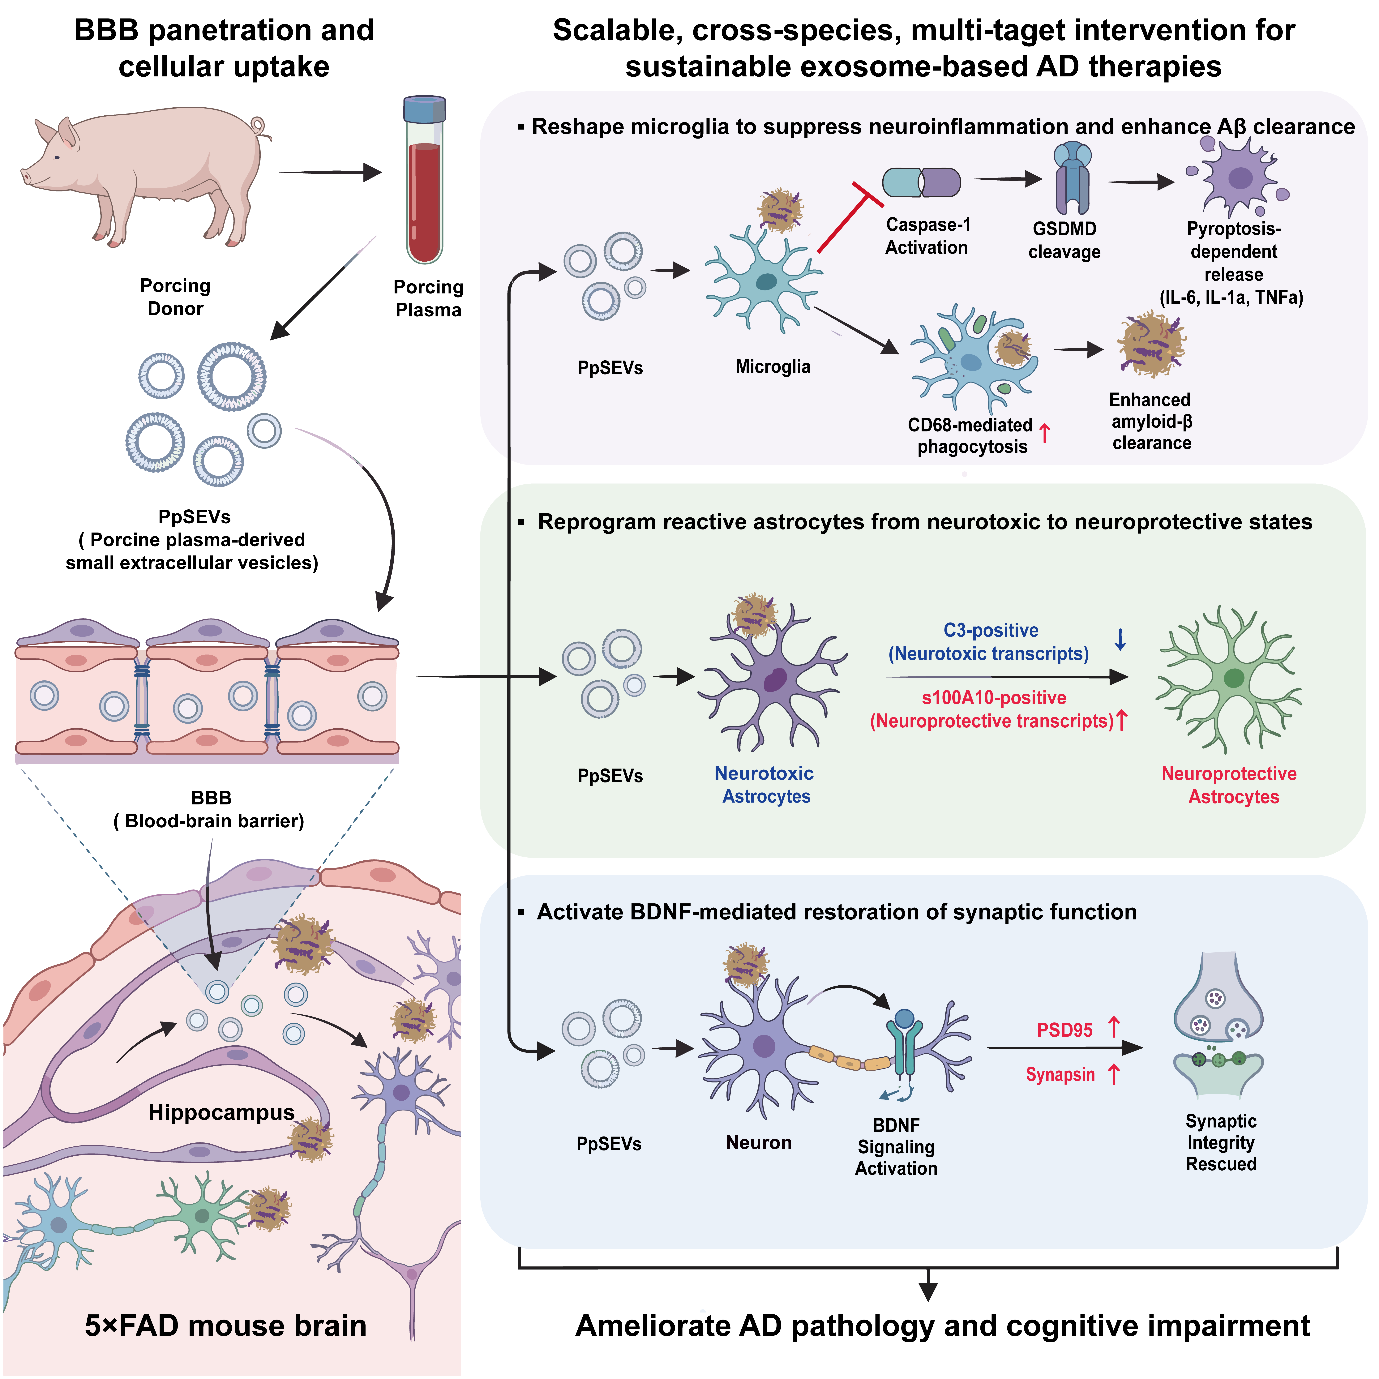


**Supplementary Figure 5. Mechanistic overview of PpSEV therapy in 5×FAD mice.** PpSEVs cross the BBB to target glial and neuronal populations, exerting tripartite effects: (1) dual modulation of microglia via pyroptosis inhibition and enhanced Aβ clearance; (2) astrocyte reprogramming switching from neurotoxic (C3-positive) to neuroprotective (S100A10-positive) states; (3) BDNF-mediated restoration of synaptic function. This multi-target strategy coordinately ameliorates AD pathology and cognitive impairment.

**Supplementary Table 1. Primers used in this study.**

| Genes | Oligonucleotides (5’-3’) | | |
| --- | --- | --- | --- |
| Forward | | Reverse |
| *GAPDH* | CATCACTGCCACCCAGAAGACTG | ATGCCAGTGAGCTTCCCGTTCAG | |
| *IL-1α* | CGAAGACTACAGTTCTGCCATT | ATGCCAGTGAGCTTCCCGTTCAG | |
| *IL-6* | TAGTCCTTCCTACCCCAATTTCC | TTGGTCCTTAGCCACTCCTTC | |
| *IL-1β* | GCAACTGTTCCTGAACTCAACT | ATCTTTTGGGGTCCGTCAACT | |
| *tnf-α* | CCCTCACACTCAGATCATCTTCT | GCTACGACGTGGGCTACAG | |
| *IFN-γ* | ATGAACGCTACACACTGCATC | CCATCCTTTTGCCAGTTCCTC | |
| *HMGB1* | GGCGAGCATCCTGGCTTATC | GGCTGCTTGTCATCTGCTG | |
| *CCL2* | TTAAAAACCTGGATCGGAACCAA | GCATTAGCTTCAGATTTACGGGT | |
| *iNOS* | GTTCTCAGCCCAACAATACAAGA | GTGGACGGGTCGATGTCAC | |
| *Ptgs2* | TGAGCAACTATTCCAAACCAGC | GCACGTAGTCTTCGATCACTATC | |
| *NF-κB* | AGGCTTCTGGGCCTTATGTG | TGCTTCTCTCGCCAGGAATAC | |
| *BDNF* | TCATACTTCGGTTGCATGAAGG | AGACCTCTCGAACCTGCCC | |
| *NGF* | CCAGTGAAATTAGGCTCCCTG | CCTTGGCAAAACCTTTATTGGG | |
| *IGF-1* | GTGAGCCAAAGACACACCCA | ACCTCTGATTTTCCGAGTTGC | |
| *FGF2* | GCGACCCACACGTCAAACTA | TCCCTTGATAGACACAACTCCTC | |
| *VEGF* | GCACATAGAGAGAATGAGCTTCC | CTCCGCTCTGAACAAGGCT | |
| *TrkB* | CTGGGGCTTATGCCTGCTG | AGGCTCAGTACACCAAATCCTA | |
| *ADNP* | GACTCCCACCACGAATCAGC | CCCGTTGAATTTAAGTTGGGCT | |
| *GDNF* | TCCAACTGGGGGTCTACGG | GCCACGACATCCCATAACTTCAT | |
| *NT-3* | GGAGTTTGCCGGAAGACTCTC | GGGTGCTCTGGTAATTTTCCTTA | |
| *Amigo2* | CTGTGTCTGTTGGTGATCGCA | CGGGCACCTTAGATAGGTTTTTG | |
| *Cxcl10* | CCAAGTGCTGCCGTCATTTTC | GGCTCGCAGGGATGATTTCAA | |
| *GBP2* | CTGCACTATGTGACGGAGCTA | GAGTCCACACAAAGGTTGGAAA | |
| *Serping1* | TAGAGCCTTCTCAGATCCCGA | ACTCGTTGGCTACTTTACCCA | |
| *Iigp1* | CAGGACATCCGCCTTAACTGT | AGGAAGTAAGTACCCATTAGCCA | |
| *Lcn2* | TGGCCCTGAGTGTCATGTG | CTCTTGTAGCTCATAGATGGTGC | |
| *Ggta1* | GGTGGTTCCCAAGCTGGTTTA | CGGGCGGTTCTTTGGATTGA | |
| *Ugt1a1* | GCTTCTTCCGTACCTTCTGTTG | GCTGCTGAATAACTCCAAGCAT | |
| *Fbln5* | GCTTGTCGTGGGGACATGAT | TGGGGTAGTTGGAAGCTGGTA | |
| *Fkbp5* | TGAGGGCACCAGTAACAATGG | CAACATCCCTTTGTAGTGGACAT | |
