# Supplementary material
Source: Research Square preprint supplement (doi:10.21203/rs.3.rs-9063095/v1)

**Original blot of Fig. 1**


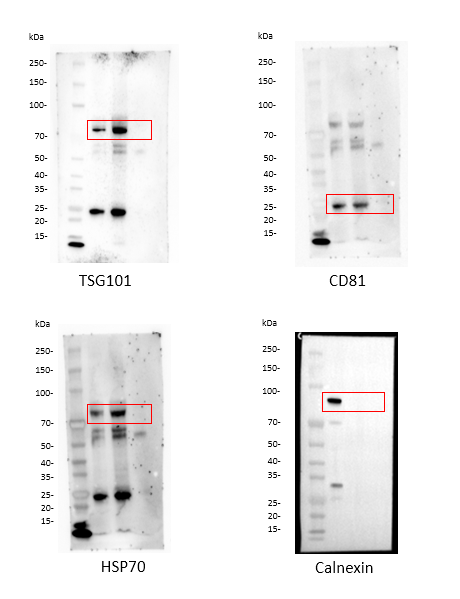


**Original blot of Fig. 3**


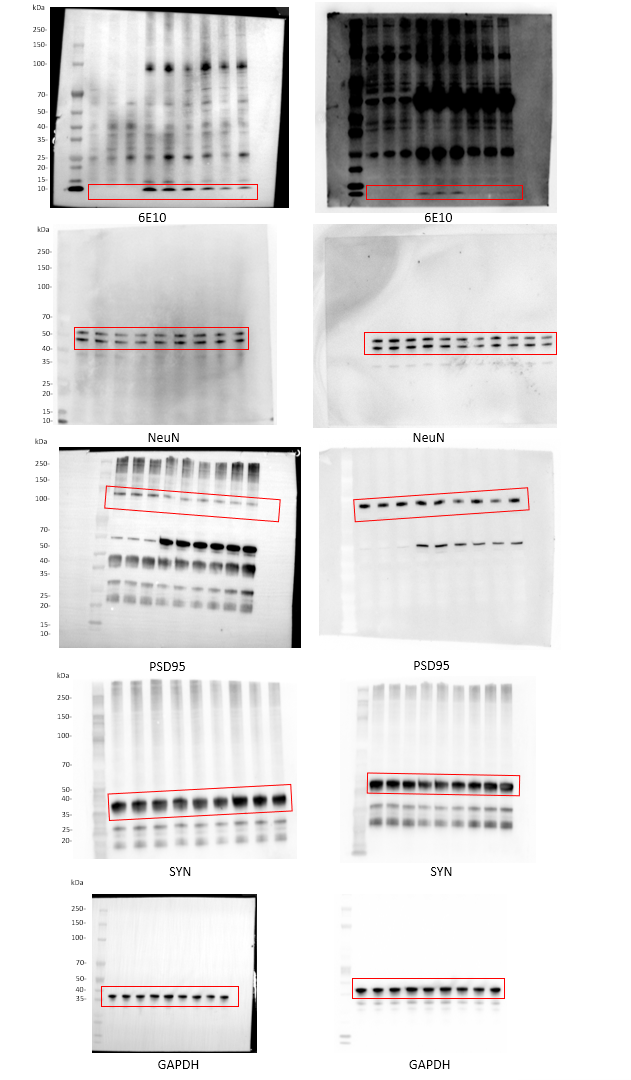


**Original blot of Fig. 5**


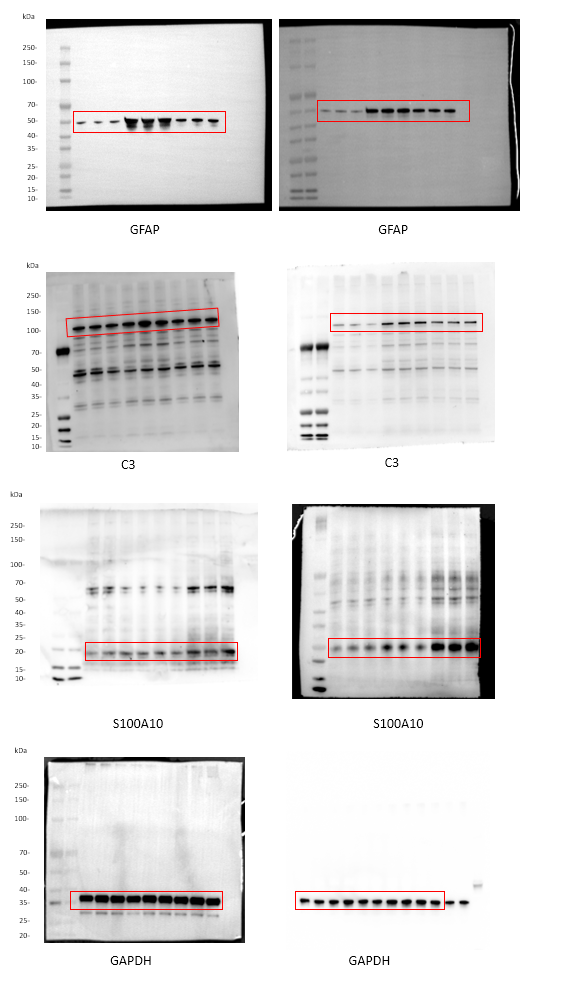


**Original blot of Fig. 6**


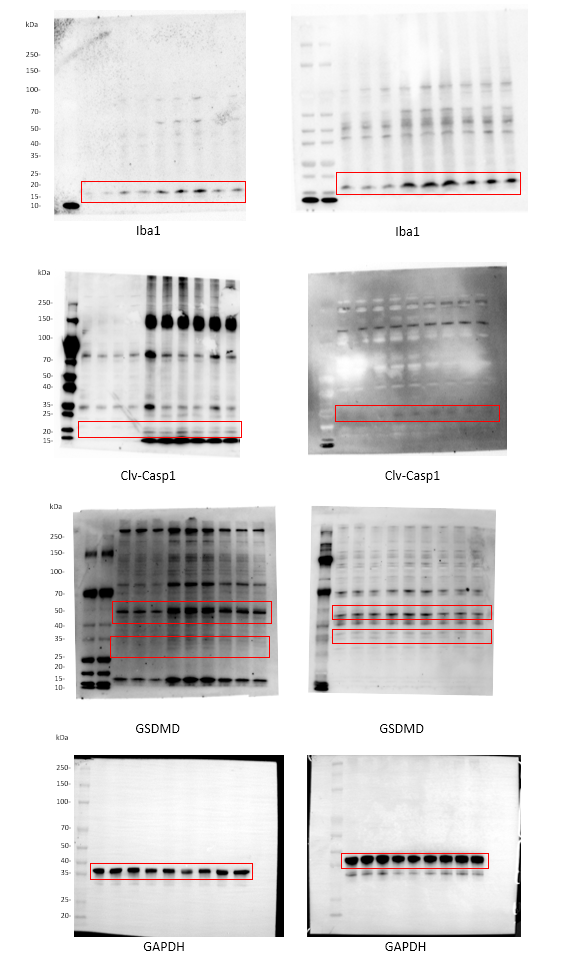


**Original blot of Fig. 7**


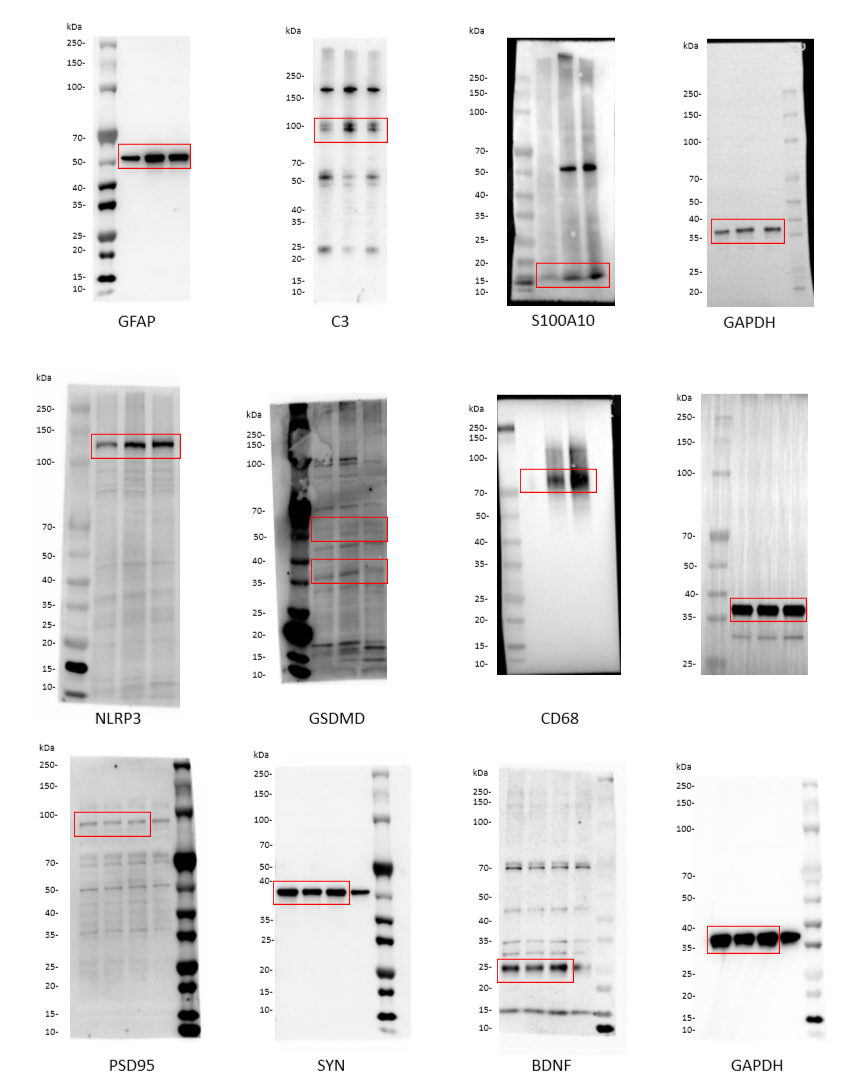

Supplement: Supplementary file 2 [file 8ecae77eb107ecee797ef53f.docx]
